# Supplementary material
Source: publisher figshare collection journal article supplement (https://acs.figshare.com/ndownloader/files/5164663)
Supplement: Supplementary file 1 [file 5164663]

# **Resonance Tunneling Diode Structures on CdTe Nanowires Made by Conductive AFM**

*Susheng Tan<sup>1</sup>, Zhiyong Tang<sup>2</sup>, Xiaorong Liang<sup># 1</sup>, Nicholas A. Kotov\*<sup>2,3</sup>*

<sup>1</sup> Department of Chemistry, Oklahoma State University, Stillwater OK 74078

<sup>2</sup> Department of Chemical Engineering, University of Michigan, Ann Arbor, MI 48109-2136

<sup>3</sup> Department of Materials Science and Department of Biomedical Engineering, Ann Arbor, MI 48109-2136;

<sup>#</sup> Current address: Department of Chemistry, Purdue University, West Lafayette, IN 47907

## **Supporting materials**

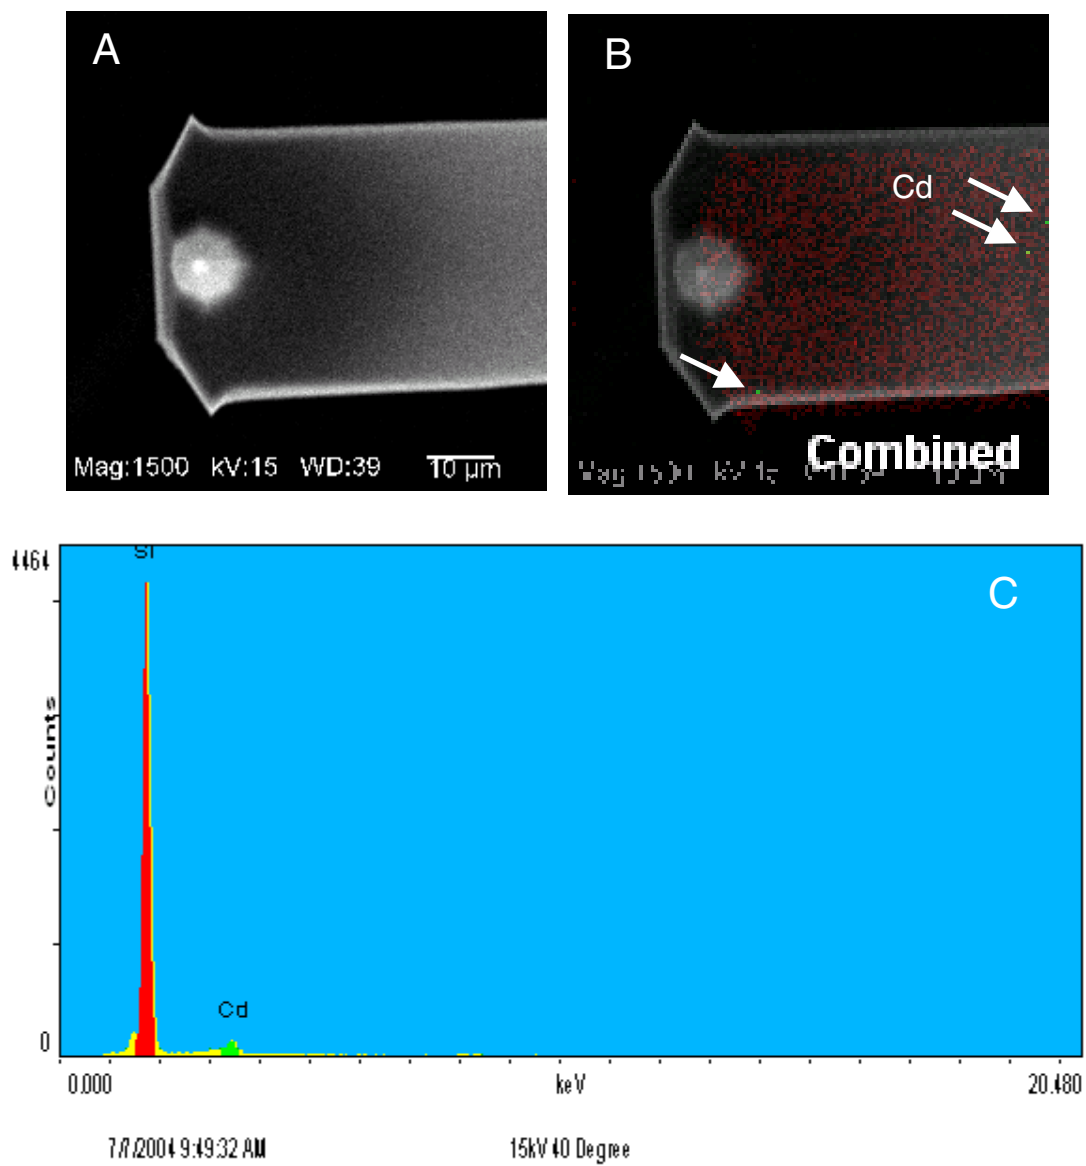

**Figure S1.** (A). SEM image; (B). Combined Si (red dots) and Cd (green dots) mapping image; and (C). Spectrum of a cantilever used for lithography on CdTe NWs.
